# Supplementary material for: Antibiotic Susceptibility and Resistance Genes in Oral Clinical Isolates of Prevotella intermedia, Prevotella nigrescens, and Prevotella melaninogenica
Source: MDPI journal article supplement (doi:10.3390/antibiotics11070888), 2022-07-04
Supplement: s1 [file s1]

# **S1. Prevalence of resistance genes in *P. intermedia*, *P. nigrescens* and *P. melaninogenica***

The prevalence of genes for resistance on the 162 isolates to  $\beta$ -lactam antibiotics such as *cfxA*, *cfxA<sub>2</sub>*, *bla<sub>TEM</sub>*, tetracyclines such as *tetM*, *tetQ*, macrolides such as *ermF*, and nitroimidazoles such as *nimAB* and *nimAEFI* was determined for isolates of *P. intermedia*, *P. nigrescens* and *P. melaninogenica*. The gene most frequently detected was *tetQ* in 40.7%, followed by *cfxA* in 26.5%, *tetM* in 25%, *ermF* in 20.6%, *bla<sub>TEM</sub>* in 17.9%, and *nimAB* in a lower percentage with 9.4%, *cfxA<sub>2</sub>* with 5%, and *nimAEFI* with 1.2%.

In *P. intermedia*, the tetracycline resistance gene *tetQ* was detected more frequently in 44.9%, followed by *tetM* in 34.7%, and less frequently *cfxA* in 16.3%, *ermF* in 6.1%, *bla<sub>TEM</sub>* in 4.1%, and *nimAB* in 2%. *nimAEFI* was not detected. For *P. nigrescens* *tetQ* gene was detected in 46%, *cfxA* 40.5%, *cfxA<sub>2</sub>* 1.3%, *ermF* 33.8%, *bla<sub>TEM</sub>* 25.6%, *tetM* 20.3%, and less frequently *nimAB* 8.1%, and *nimAEFI* 1.3%. In *P. melaninogenica* *cfxA<sub>2</sub>*, *bla<sub>TEM</sub>*, *tetM*, and *nimAB* were detected more frequently with 20.5%, and less frequently *cfxA* and *ermF* with 12.8%, and *nimAEFI* with 2.6%.

**Table S1.** Frequency of genes *cfxA*, *cfxA<sub>2</sub>*, *bla<sub>TEM</sub>*, *tetM*, *tetQ*, *ermF*, *nimAB* and *nimAEFI* in 162 oral isolates of *P. intermedia*, *P. nigrescens*, y *P. melaninogenica*

| <i>Bacteria</i>          | <b>n</b> | <i>cfxA</i><br>F(%) | <i>cfxA<sub>2</sub></i><br>F(%) | <i>bla<sub>TEM</sub></i><br>F(%) | <i>tetM</i><br>F(%) | <i>tetQ</i><br>F(%) | <i>nimAB</i><br>F(%) | <i>nimAEFI</i><br>F(%) | <i>ermF</i><br>F(%) |
|--------------------------|----------|---------------------|---------------------------------|----------------------------------|---------------------|---------------------|----------------------|------------------------|---------------------|
| <i>P. intermedia</i>     | 49       | 8(16,3)             | 0                               | 2(4,1)                           | 17(34,7)            | 22(44,9)            | 1(2)                 | 0                      | 3(6,1)              |
| <i>P. nigrescens</i>     | 74       | 30(40,5)            | 1(1,3)                          | 19(25,6)                         | 15(20,3)            | 34(46)              | 6(8,1)               | 1 (1,3)                | 25(33,8)            |
| <i>P. melaninogenica</i> | 39       | 5(12,8)             | 8(20,5)                         | 8(20,5)                          | 8(20,5)             | 11(28,2)            | 8(20,5)              | 1(2,6)                 | 5(12,8)             |
| <i>Total</i>             | 162      | 43(26,5)            | 8 (5)                           | 29(17,9)                         | 40 (25)             | 66(40,7)            | 15 (9,4)             | 2 (1,2)                | 33(20,6)            |
